# Supplementary material
Source: PubMed Central journal article supplement (PMC11027638)
Supplement: 262_2020_2538_MOESM1_ESM.pdf [file 262_2020_2538_MOESM1_ESM.pdf]

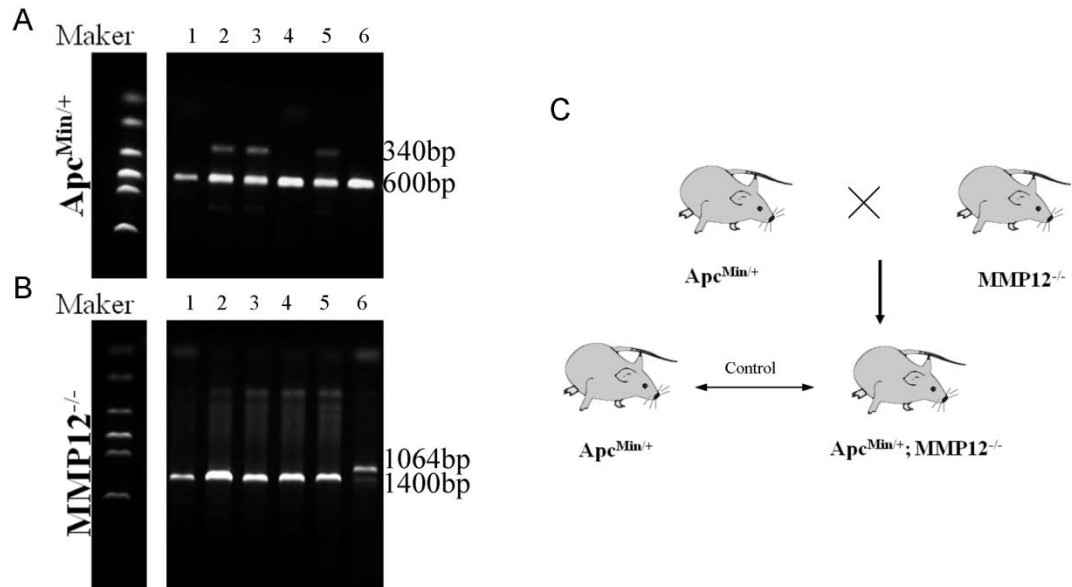

**Fig. S1** Genotype identification and mice crossbreeding. A: Genotype identification of *Apc<sup>Min/+</sup>* mice by PCR: the APC mutation PCR product size is 340 bp. The WT PCR product size is 600 bp. B: Genotype identification of *MMP12<sup>-/-</sup>* mice: the MMP12 knockout PCR product size is 1400 bp. The WT PCR product size was 1064 bp. C. The schematic of the strategy for crossbreeding *Apc<sup>Min/+</sup>* mice with *MMP12<sup>-/-</sup>* mice.

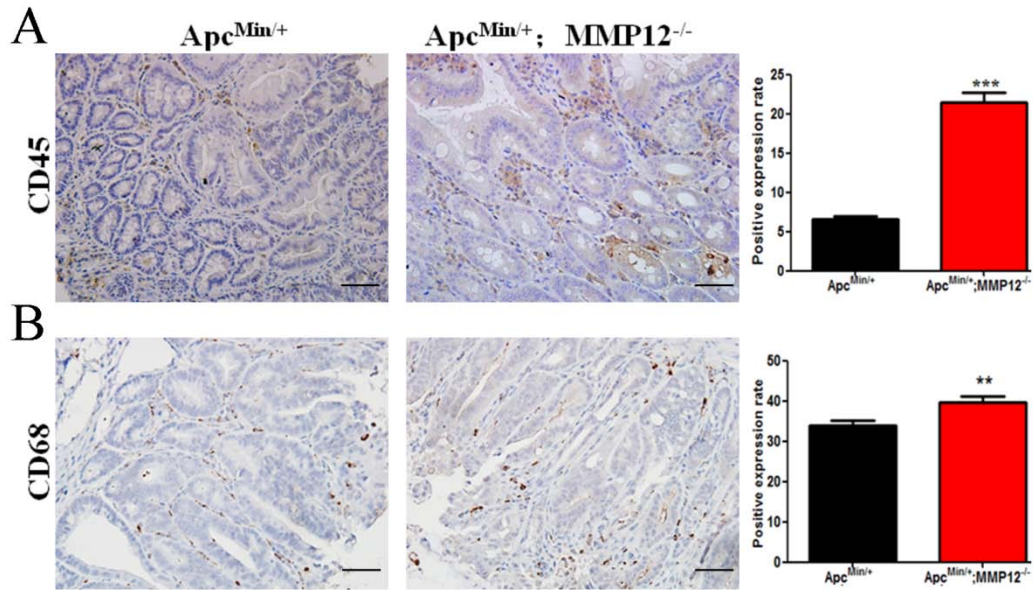

**Fig. S2** Knocking out MMP12 increases macrophage numbers in the intestinal tumor microenvironment. A. Immunohistochemistry results indicated that CD45-positive cell numbers increased in intestinal tumor tissue samples from  $Apc^{Min/+}; MMP12^{-/-}$  mice compared with  $Apc^{Min/+}$  mice. B. The proportion of CD68-positive cells in intestinal tumor tissue was higher in  $Apc^{Min/+}; MMP12^{-/-}$  mice than in  $Apc^{Min/+}$  mice (n=6, 40 $\times$ ).

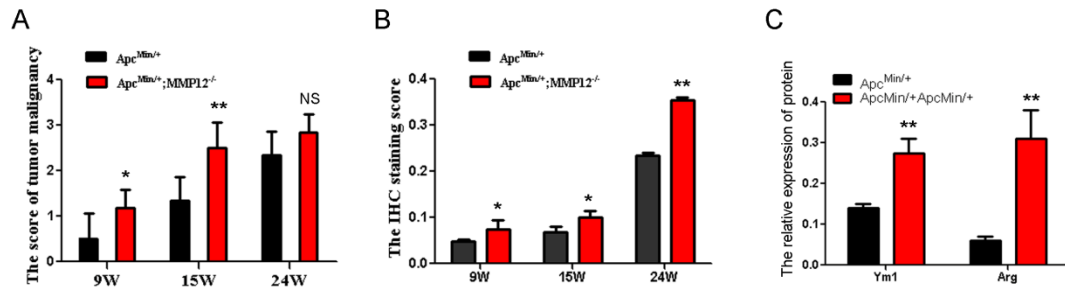

**Fig. S3** A. The score of tumor malignancy of *Apc<sup>Min/+</sup>;MMP12<sup>-/-</sup>* mice and *Apc<sup>Min/+</sup>* mice in 9, 15, 15 weeks old. B. The score of IHC staining of  $\beta$ -catenin about intestinal tumor of 9, 15, 15 weeks old. C. The relative expression of M2 protein marker Ym1 and Arg. The number of mice in above results, n=7-9, \* p<0.05, \*\* p<0.05.

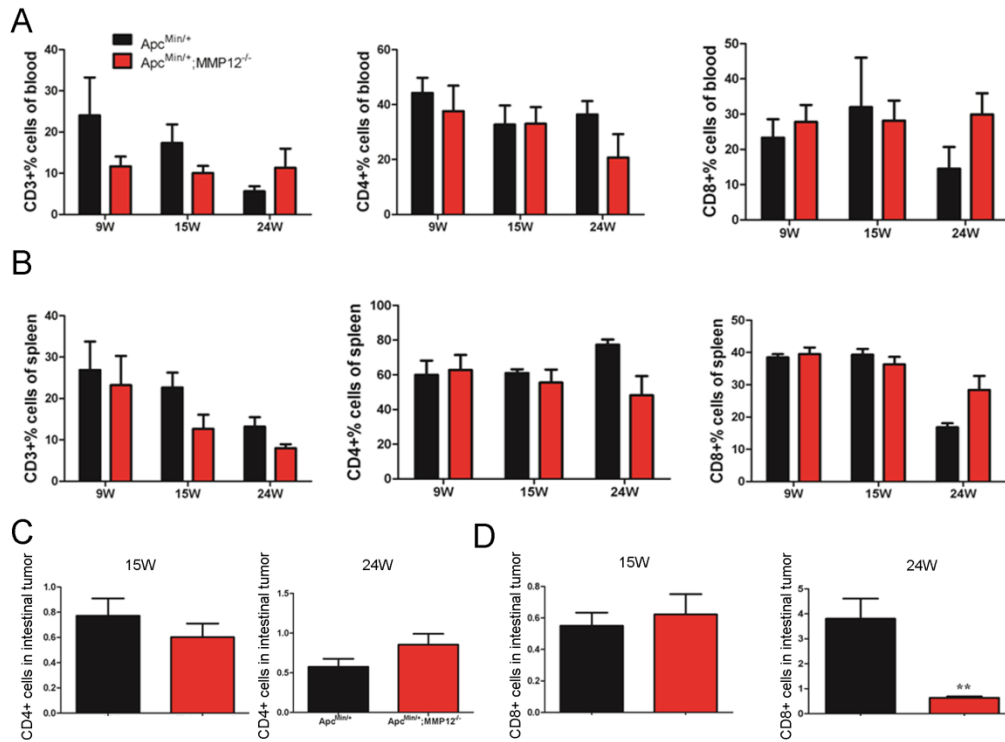

**Fig. S4.** The infiltrating lymphocytes in peripheral blood, spleen, and tumor tissue. A. The CD3 +, CD4, and CD8+ cells in peripheral blood have no differences compared *Apc<sup>Min/+</sup>;MMP12<sup>-/-</sup>* mice with *Apc<sup>Min/+</sup>* mice, even in different age stage. B. The CD3 +, CD4, and CD8+ cells in spleen have no differences compared *Apc<sup>Min/+</sup>;MMP12<sup>-/-</sup>* mice with *Apc<sup>Min/+</sup>* mice, even in different age stage. C. The CD4+ cells in intestinal tumor have no differences compared *Apc<sup>Min/+</sup>;MMP12<sup>-/-</sup>* mice with *Apc<sup>Min/+</sup>* mice. D. The CD8+ cells in intestinal tumor have no differences compared *Apc<sup>Min/+</sup>;MMP12<sup>-/-</sup>* mice with *Apc<sup>Min/+</sup>* mice. But at 24 weeks, the CD8+ cells number decreased. The mice number in all experimental, n=7-9, \* P<0.05, \*\* P<0.01.

**Table S1 RT-PCR Primers**

| <b>Gene name</b>                  | <b>Primer(5' to 3')</b>           |                                  |
|-----------------------------------|-----------------------------------|----------------------------------|
| <b>m- Inos</b>                    | Forward: ACCCTAAGAGTCACCAAATGGC   | Reverse: TTGATCCTCACATACTGTGGACG |
| <b>m-Fizz1</b>                    | Forward: TCCAGCTAACTATCCCTCCACTGT | Reverse: GGCCCATCTGTTCATAGTCTTGA |
| <b>m-Ym1</b>                      | Forward: GGGCATAACCTTTATCCTGAG    | Reverse: CCACTGAAGTCATCCATGTC    |
| <b>m-Arginase 1</b>               | Forward: AACACGGCAGTGGCTTTAACC    | Reverse: GGTTTTTCATGTGGCGCATTC   |
| <b>m-IL-4</b>                     | Forward: GGTCTCAACCCCCAGCTAGT     | Reverse: GCCGATGATCTCTCTCAAGTGAT |
| <b>m-IL-13</b>                    | Forward: CCTGGCTCTTGCTTGCCTT      | Reverse: GGTCTTGTGTGATGTTGCTCA   |
| <b>m-IL-10</b>                    | Forward: CTTACTGACTGGCATGAGGATCA  | Reverse: GCAGCTCTAGGAGCATGTGG    |
| <b>m-TGF-beta1</b>                | Forward: CTCCCGTGGCTTCTAGTGC      | Reverse: GCCTTAGTTTGGACAGGATCTG  |
| <b>m-TNF-<math>\alpha</math></b>  | Forward: CAGGCGGTGCCTATGTCTC      | Reverse: CGATCACCCCGAAGTTCAGTAG  |
| <b>m-GAPDH</b>                    | Forward:GGTGAAGGTCGGTGTGAACG      | Reverse:CTCGCTCCTGGAAGATGGTG     |
| <b>m-<math>\beta</math> actin</b> | Forward:GAGACCTTCAACACCCCAGC      | Reverse:ATGTCACGCACGATTTCCC      |
